# Supplementary material
Source: Royal Society of Chemistry journal article supplement (doi:10.1039/d6cc02109c)
Supplement: d6cc02109c1.pdf [file d6cc02109c1.pdf]

*Supporting Information*

**Synthesis, Crystal Structure, and Inherent Chirality in Hexa(tert-butylphenyl)-Substituted [6]Cycloparaphenylene**

Xiaoyu Zhang,<sup>a</sup> Xinyu Zhang,<sup>a</sup> Dapeng Lu,<sup>\*b</sup> Qiang Huang,<sup>c</sup> Pingwu Du<sup>\*a</sup>

---

<sup>a</sup> Key Laboratory of Precision and Intelligent Chemistry, Department of Materials Science and Engineering, University of Science and Technology of China, 96 Jinzhai Road, Hefei, Anhui Province, 230026, P. R. China.

<sup>b</sup> Inflammation and Immune Mediated Diseases Laboratory of Anhui Province, Anhui Institute of Innovative Drugs, School of Pharmacy, Anhui Medical University, 81 Meishan Road, Hefei, Anhui Province, 230032, P. R. China.

<sup>c</sup> School of Chemistry and Chemical Engineering, Nantong University, Nantong, 226019, China.

\*Corresponding author: [dupingwu@ustc.edu.cn](mailto:dupingwu@ustc.edu.cn); [ludapeng@ahmu.edu.cn](mailto:ludapeng@ahmu.edu.cn)  
Tel/Fax: 86-551-63606207

---

## 1. Materials and General Information

All solvents for syntheses were obtained from commercial suppliers (Innochem or Acros) and used without further purification. Air-sensitive reactions were all carried out under argon.  $[\text{Au}_2\text{Cl}_2(\text{dcpm})]$  and  $\text{PhICl}_2$  were synthesized according to literature procedures.<sup>1,2</sup> The NMR spectra were recorded on a Bruker BioSpin ( $^1\text{H}$  400 MHz,  $^{13}\text{C}$  100 MHz) spectrometer in  $\text{CDCl}_3$  solution at 298 K. The chemical shifts for  $^1\text{H}$  NMR are expressed in parts per million (ppm) relative to tetramethylsilane ( $\delta = 0.00$  ppm) or  $\text{CHCl}_3$  ( $\delta = 7.26$  ppm). Chemical shifts for  $^{13}\text{C}$  NMR are expressed ppm relative to  $\text{CDCl}_3$  ( $\delta = 77.0$  ppm). Data are reported as follows: chemical shift, multiplicity (s = singlet, d = doublet, m = multiplet), coupling constant (Hz), and integration. High-resolution mass spectrometry (HR-MS) analyses were carried out using MALDI-TOF-MS techniques and trans-2-[3-(4-tert-Butylphenyl)-2-methyl-2-propenylidene]malononitrile as the matrix. UV/Vis absorption spectra were performed on a UNIC-3802 spectrophotometer. Circular dichroism (CD) spectra were performed on a CD spectrometer (JASCO, J-1500). Preparative thin-layer chromatography (PTLC) was performed using silica gel GF254 precoated plates and flash chromatography was performed on silica gel (200~300 mesh).

## 2. Synthetic Details

**Synthesis of compound 3.** The starting material **1** was synthesized according to the literature report.<sup>3</sup> A mixture of **1** (100 mg, 0.18 mmol, 1.0 equiv), **2** (70 mg, 0.39 mmol, 2.2 equiv), and K<sub>2</sub>CO<sub>3</sub> (147 mg, 1.06 mmol, 6.0 equiv) in a round-bottomed flask was dissolved in toluene (8 mL), ethanol (2 mL), and water (2 mL). Pd(PPh<sub>3</sub>)<sub>4</sub> (20 mg, 17 μmol, 0.1 equiv) was then added under an argon atmosphere, and the reaction mixture was heated at 100 °C for 24 h. After cooling to room temperature, the solvent was removed under reduced pressure, and the residue was extracted with CH<sub>2</sub>Cl<sub>2</sub>. The combined organic layers were dried over anhydrous MgSO<sub>4</sub> and concentrated under reduced pressure. The crude product was purified by column chromatography (petroleum ether) to afford **3** as a white solid (87 mg, 85% yield). <sup>1</sup>H NMR (CDCl<sub>3</sub>, 400 MHz): δ 7.50 (d, *J* = 2.1 Hz, 1H), 7.48 (d, *J* = 2.1 Hz, 1H), 7.30 (d, *J* = 2.1 Hz, 2H), 7.26 (s, 1H), 7.24 (s, 1H), 6.97 (d, *J* = 8.4 Hz, 4H), 6.38 (d, *J* = 8.4 Hz, 4H), 1.30 (s, 18H). <sup>13</sup>C NMR (CDCl<sub>3</sub>, 100 MHz): δ 149.33, 142.56, 137.90, 136.30, 133.17, 132.72, 130.11, 128.16, 124.70, 121.69, 34.39, 31.33. HR-MS (MALDI-TOF) *m/z* calcd. for C<sub>32</sub>H<sub>32</sub>Br<sub>2</sub> [M]<sup>+</sup>: 576.0850, found: 576.0845.

**Synthesis of compound 4.** To a mixture of compound **3** (75 mg, 0.13 mmol, 1.0 equiv), KOAc (102 mg, 1.04 mmol, 8.0 equiv), Pd(dppf)Cl<sub>2</sub> (10 mg, 13.66 μmol, 0.1 equiv) and B<sub>2</sub>pin<sub>2</sub> (130 mg, 0.51 mmol, 4.0 equiv) in a round-bottom flask was added 1,4-dioxane (6 mL), then, the solution was heated to 90 °C for 48 hours under nitrogen atmosphere. Upon cooling to room temperature, the solvent was removed under reduced pressure. The crude product was purified by column chromatography

(PE/CH<sub>2</sub>Cl<sub>2</sub> = 3/1) to afford **4** as a white solid (55 mg, 63% yield). <sup>1</sup>H NMR (CDCl<sub>3</sub>, 400 MHz) δ 7.80 – 7.77 (m, 2H), 7.59 (d, *J* = 1.2 Hz, 2H), 7.43 (d, *J* = 7.5 Hz, 2H), 6.92 (d, *J* = 8.4 Hz, 4H), 6.45 (d, *J* = 8.4 Hz, 4H), 1.28 (s, 18H), 1.26 (s, 24H). <sup>13</sup>C NMR (CDCl<sub>3</sub>, 100 MHz): δ 148.29, 142.86, 140.04, 137.84, 136.62, 133.28, 131.34, 128.45, 124.31, 83.79, 34.27, 31.39, 25.11, 24.71. HR-MS (MALDI-TOF) *m/z* calcd. for C<sub>44</sub>H<sub>56</sub>B<sub>2</sub>O<sub>4</sub> [M]<sup>+</sup>: 670.4365, found: 670.4355.

**Synthesis of [6]CPP-6'BuPh.** A mixture of **4** (100 mg, 149 μmol, 1.0 equiv), [Au<sub>2</sub>Cl<sub>2</sub>(dcpm)] (130 mg, 149 μmol, 1.0 equiv), and Cs<sub>2</sub>CO<sub>3</sub> (291 mg, 895 μmol, 6.0 equiv) in degassed toluene/EtOH/H<sub>2</sub>O (8 mL/2 mL/2 mL) was stirred for 48 hours at 50 °C under argon atmosphere. The resulting precipitate was collected by suction filtration and washed by EtOH (50 mL). The residual solid was dried in vacuo to afford crude product **5** (135 mg, 75% yield) as a white solid, which was used without further purification.

To a suspension of **5** (135 mg, 36 μmol, 1.0 equiv) in degassed and dry DMF (20 mL) was added PhICl<sub>2</sub> (11 mmol/L in degassed and dry DMF, 10 mL, 110 μmol, 3.0 equiv) dropwise with stirring at –60 °C for 5 min. The reaction mixture was stirred at the same temperature for 30 min, then it was allowed to warm to 25 °C and stirred for 24 h. Solvent and iodobenzene (by-product) were removed under vacuum. The crude product was purified by silica gel column chromatography (hexane/CH<sub>2</sub>Cl<sub>2</sub> = 20/1) to give **[6]CPP-6'BuPh** as a yellow solid (18 mg, 40% yield). This target product was characterized by <sup>1</sup>H NMR spectroscopy and high-resolution mass spectrometry (HR-MS). <sup>1</sup>H NMR (CDCl<sub>3</sub>, 400 MHz, 298 K): δ 7.82 (d, *J* = 8.3 Hz, 12H), 7.73 (d, *J* = 1.9

Hz, 6H), 7.50 (d,  $J = 8.3$  Hz, 12H), 6.81 (dd,  $J = 8.7, 1.9$  Hz, 6H), 6.74 (s, 6H), 1.38 (s, 54H).  $^{13}\text{C}$  NMR ( $\text{CDCl}_3$ , 100 MHz):  $\delta$  150.68, 138.97, 138.55, 138.45, 138.42, 135.40, 131.46, 129.16, 126.12, 124.07, 34.71, 31.48. HR-MS (MALDI-TOF)  $m/z$  calcd. for  $\text{C}_{96}\text{H}_{96} [\text{M}]^+$ : 1249.7545, found: 1249.7569.

### 3. $^1\text{H}$ and $^{13}\text{C}$ NMR Spectra and HRMS Studies

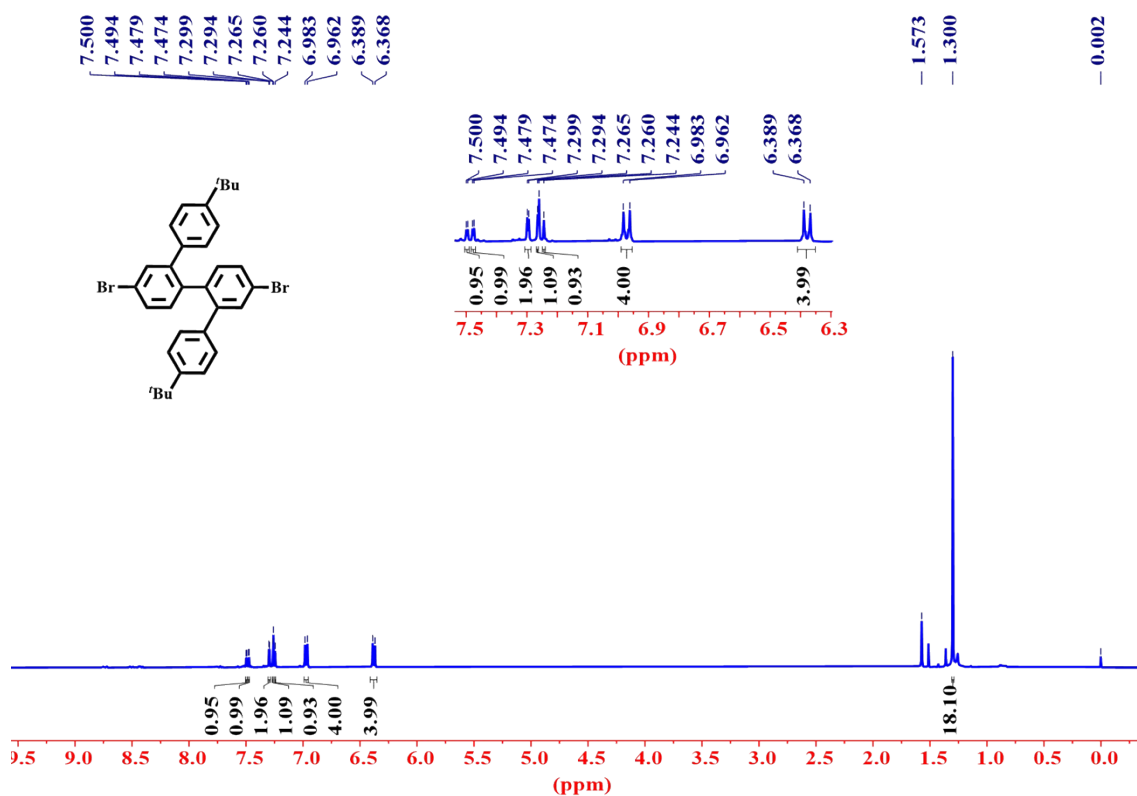

Fig. S1  $^1\text{H}$  NMR spectrum of compound **3** (400 MHz,  $\text{CDCl}_3$ , 298 K).

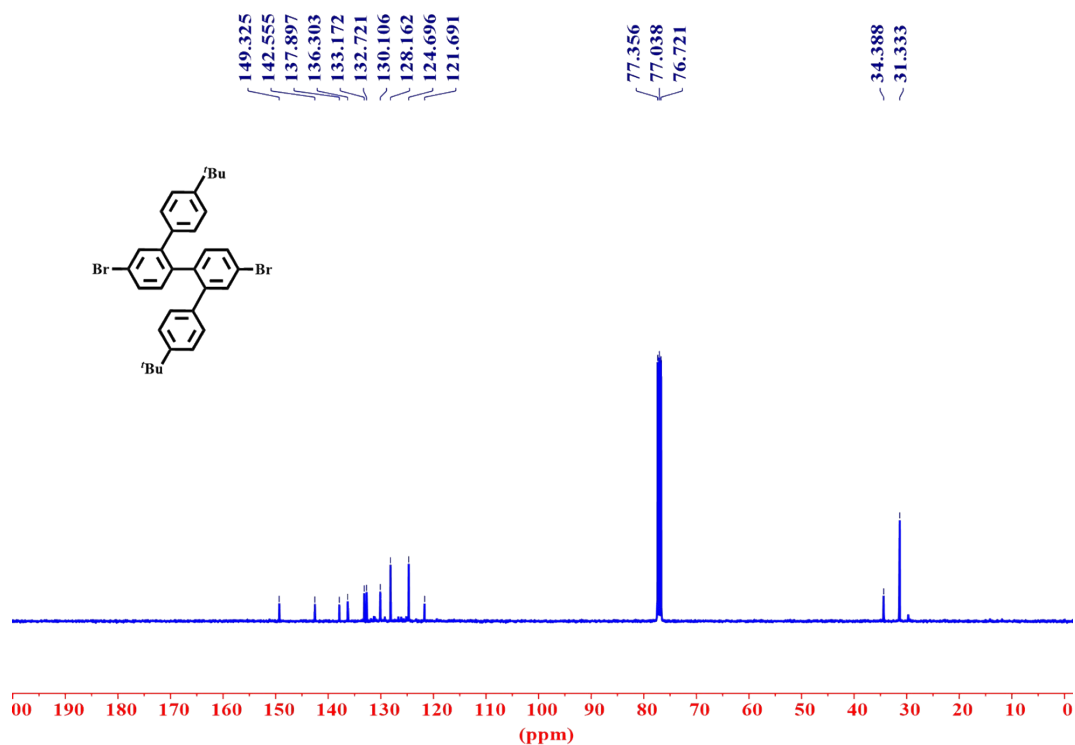

Fig. S2  $^{13}\text{C}$  NMR spectrum of compound **3** (100 MHz,  $\text{CDCl}_3$ , 298 K).

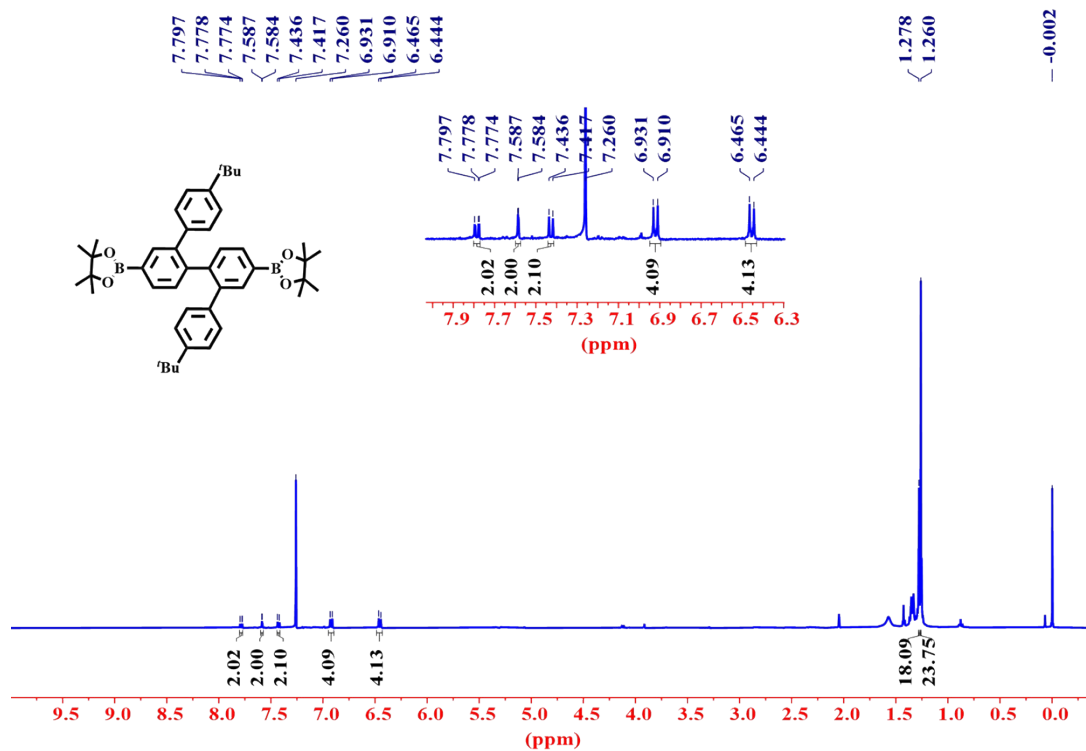

**Fig. S3**  $^1\text{H}$  NMR spectrum of **4** (400 MHz,  $\text{CDCl}_3$ , 298 K).

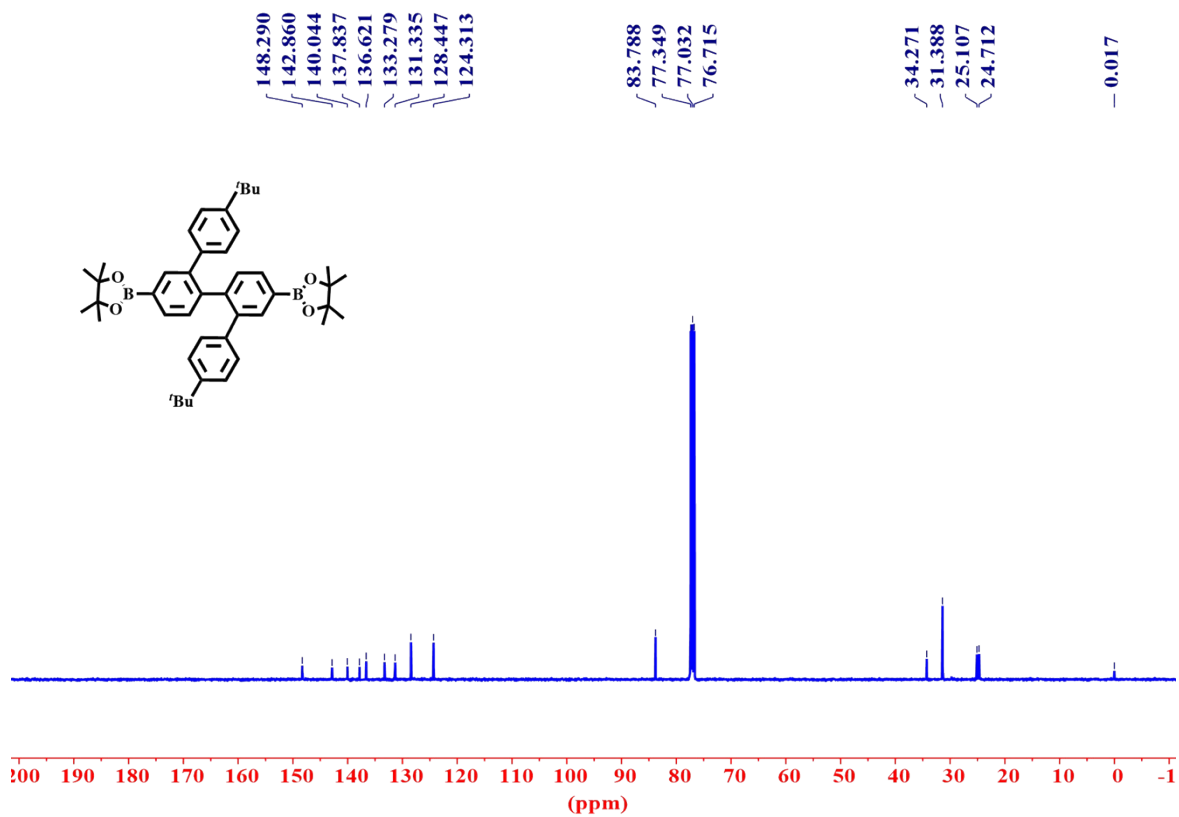

**Fig. S4**  $^{13}\text{C}$  NMR spectrum of **4** (100 MHz,  $\text{CDCl}_3$ , 298 K).

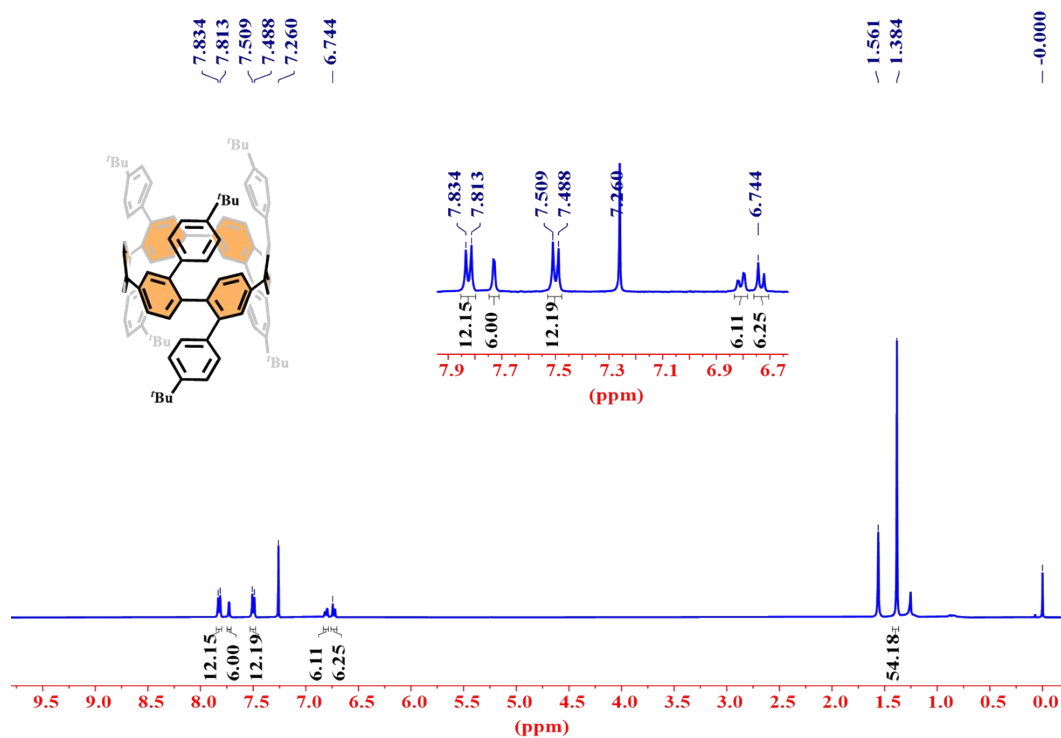

Fig. S5 <sup>1</sup>H NMR spectrum of [6]CPP-6'BuPh (400 MHz, CDCl<sub>3</sub>, 298 K).

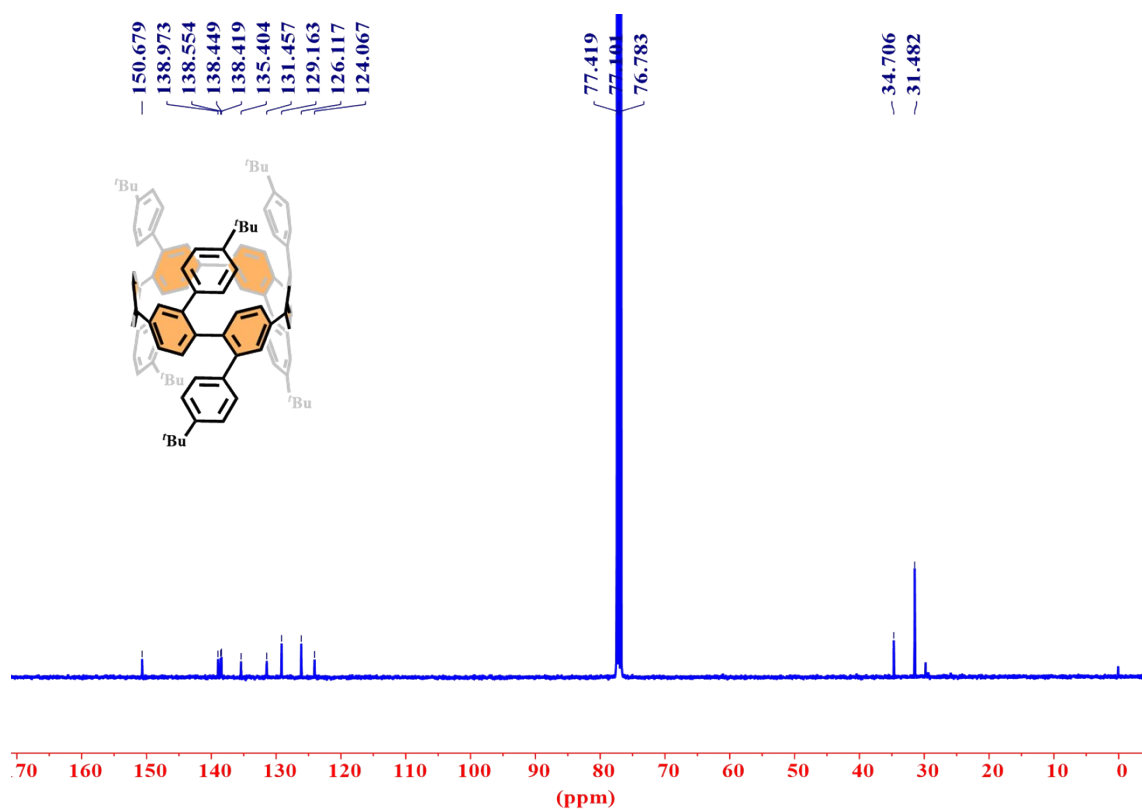

Fig. S6 <sup>13</sup>C NMR spectrum of [6]CPP-6'BuPh (100 MHz, CDCl<sub>3</sub>, 298 K).

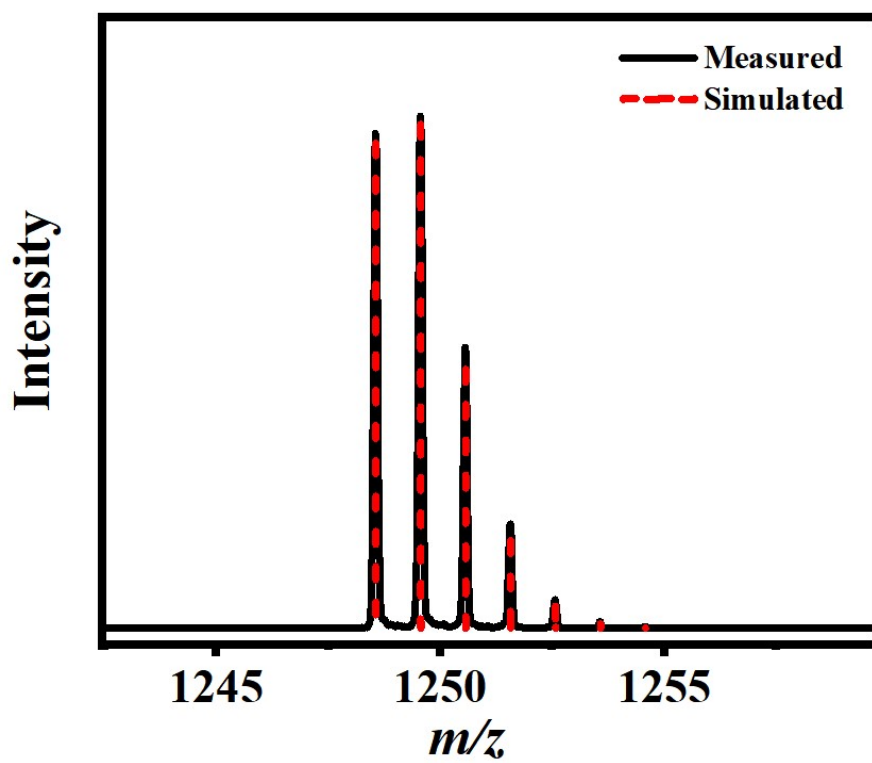

**Fig. S7** MALDI-TOF MS spectrum (black solid line) and simulated data (red dash line) for [6]CPP-6'BuPh.

#### 4. Crystal Structures and Crystal Data

Yellow single crystals of [6]CPP-6'BuPh suitable for X-ray diffraction were obtained by slow liquid-liquid diffusion, in which methanol was carefully layered onto a benzene solution of the compound. After standing undisturbed for approximately one week, single crystals gradually formed at the solvent interface. Data collection for [6]CPP-6tBuPh was carried out on a Bruker D8 VENTURE diffractometer at 150.0 K. The structures were refined using all data (based on  $F^2$ ) by SHELX 2018 within Olex2. Crystallographic data of [6]CPP-6'BuPh can be obtained free of charge from the Cambridge Crystallographic Data Center (CCDC number: 2521143 for [6]CPP-6'BuPh).

**Table S1.** Crystal data and structure refinement for [6]CPP-6'BuPh

| Complex                          | [6]CPP-6'BuPh                   |
|----------------------------------|---------------------------------|
| Formular                         | C <sub>96</sub> H <sub>96</sub> |
| Formular weight                  | 1249.82                         |
| Temperature/K                    | 150                             |
| Crystal system                   | triclinic                       |
| Space group                      | $P\bar{1}$                      |
| a / Å                            | 14.1436                         |
| b / Å                            | 17.1687                         |
| c / Å                            | 20.6678                         |
| $\alpha$ / deg                   | 108.502                         |
| $\beta$ / deg                    | 95.339                          |
| $\gamma$ / deg                   | 113.214                         |
| Volume/Å <sup>3</sup>            | 4234.8                          |
| Z                                | 2                               |
| $\rho_{\text{calc}}/\text{cm}^3$ | 1.107                           |

|                                                |                                                                    |
|------------------------------------------------|--------------------------------------------------------------------|
| $\mu/\text{mm}^{-1}$                           | 0.322                                                              |
| F(000)                                         | 1522.0                                                             |
| Crystal size/ $\text{mm}^3$                    | 0.09×0.07×0.03                                                     |
| Radiation                                      | GaK $\alpha$ ( $\lambda = 1.34139$ )                               |
| 2 $\Theta$ range for data collection/ $^\circ$ | 4.052 – 92.302                                                     |
| Index ranges                                   | $-15 \leq h \leq 15$ , $-18 \leq k \leq 18$ , $-22 \leq l \leq 22$ |
| Reflections collected                          | 70325                                                              |
| Independent reflections                        | 10913 [ $R_{\text{int}} = 0.1356$ , $R_{\text{sigma}} = 0.0842$ ]  |
| Data/restraints/parameters                     | 10913/231/1023                                                     |
| Goodness-of-fit on $F^2$                       | 1.027                                                              |
| Final R indexes [ $I \geq 2\sigma(I)$ ]        | $R_1 = 0.0596$ , $wR_2 = 0.1486$                                   |
| Final R indexes [all data]                     | $R_1 = 0.1042$ , $wR_2 = 0.1712$                                   |

---

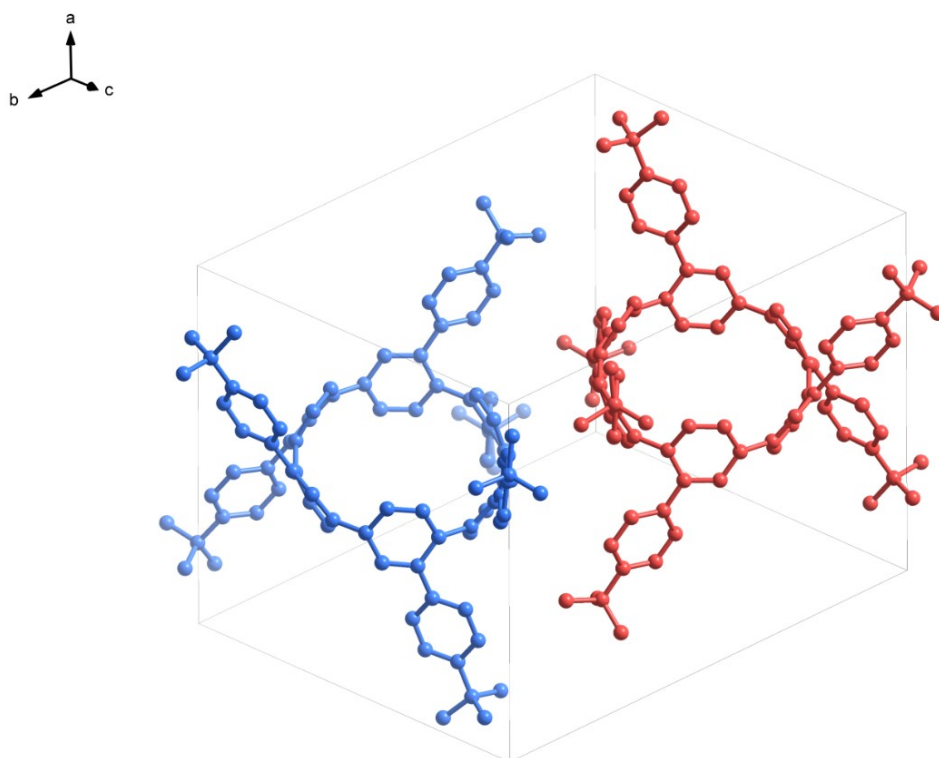

**Fig. S8** Presentation of the positions for a pair of enantiomers in the crystal unit cell.

## 5. Chiral HPLC Analysis

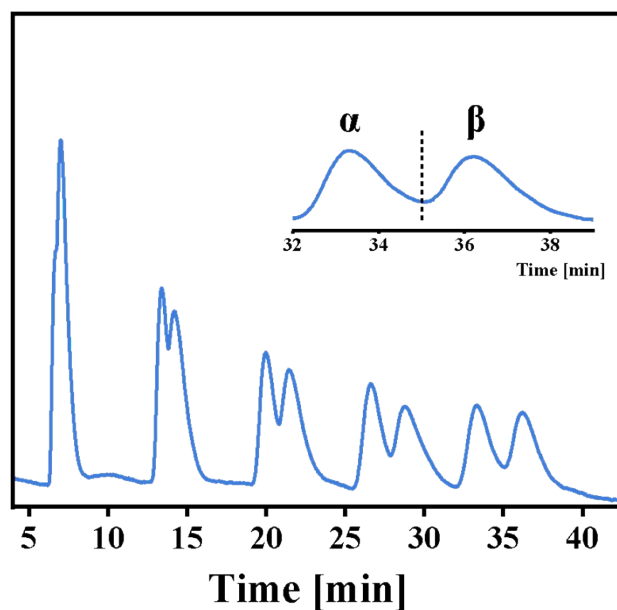

**Fig. S9** Successful separation of [6]CPP-6'BuPh equipped with CHIRALPAK IK column (10 mm I.D.  $\times$  250 mm) eluted by PE/DCM (20:1) monitored with the absorption at 350 nm.

## 6. Computational Details

The stationary points were obtained from the geometric optimizations at the  $\omega$ b97xd<sup>4</sup>/6-31G(d)<sup>5,6</sup> level and further validated by vibrational frequency analysis (no imaginary frequency). The single-point energies of all species were taken into account by using the same functional combined with the Def2TZVP<sup>7</sup> basis set. As B3LYP<sup>8</sup> was more accurate for calculating orbital energy than  $\omega$ b97xd,<sup>9</sup> B3LYP/Def2TZVP theoretical level was applied to identify the energy level of frontier orbitals. The excitation energies and oscillator strengths of the nanohoops were calculated with time-dependent density functional theory (TD-DFT)<sup>10,11</sup> at the PBE0<sup>12</sup>/6-311G(d,p)<sup>13</sup> level. Solvent effects of dichloromethane ( $\epsilon = 8.93$ ) were implicitly taken into account by applying the polarizable continuum model (PCM)<sup>14,15</sup> developed by Tomasi's group in the framework of the self-consistent reaction field (SCRF).<sup>16,17</sup> Strain energy visualization was achieved by using StrainViz.<sup>18</sup> The wave function analysis were implemented in Multiwfn 3.8(dev) code<sup>19,20</sup> and rendered by VMD 1.9.3 program.<sup>21</sup> All calculations were carried out with the Gaussian 16 program.<sup>22</sup>

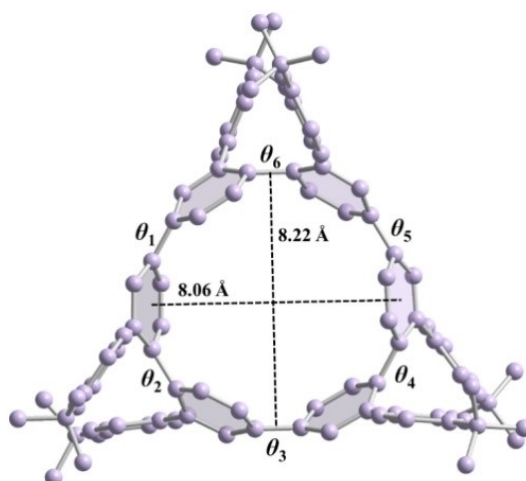

**Fig. S10** The relaxed structures and calculated diameters of [6]CPP-6'BuPh.

**Table S2.** The torsion angles (Unit: degree) between adjacent phenyl rings of the relaxed structures of [6]CPP-6'BuPh.

|                          |                                      |           |
|--------------------------|--------------------------------------|-----------|
|                          | $\theta_1$                           | 37        |
|                          | $\theta_2$                           | -37       |
| Torsion angles<br>(deg.) | $\theta_3$                           | 37        |
|                          | $\theta_4$                           | -37       |
|                          | $\theta_5$                           | 37        |
|                          | $\theta_6$                           | -37       |
|                          | <b>Average <math> \theta </math></b> | <b>37</b> |

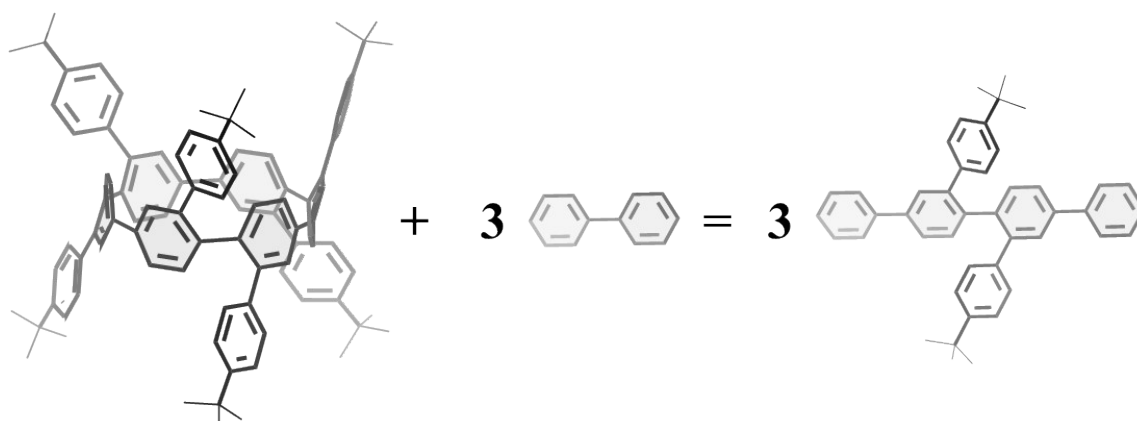

**Fig. S11** The homodesmotic reactions for strain energy estimation.

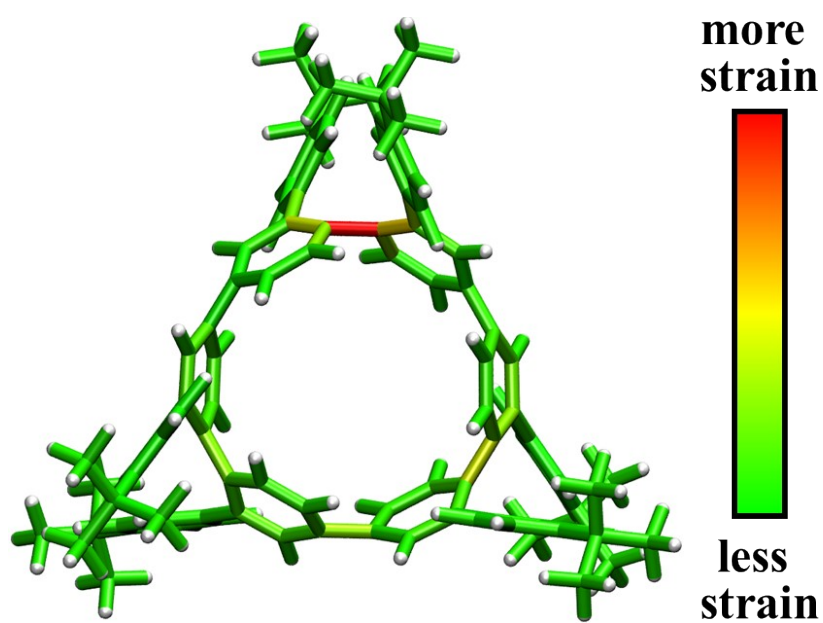

**Fig. S12** StrainViz analysis of [6]CPP-6'BuPh.

**Table S3.** The calculated strain energies of [6]CPP-6'BuPh by homodesmotic reaction method.

| Optimized Structure                                                                | Total Energy (Hartree) | Strain Energy ( $\Delta H$ , kcal·mol <sup>-1</sup> ) |
|------------------------------------------------------------------------------------|------------------------|-------------------------------------------------------|
|   | -463.1079622           | -                                                     |
|   | -1701.2804591          | -                                                     |
|  | -3714.3766333          | <b>-88.38 kcal/mol</b>                                |

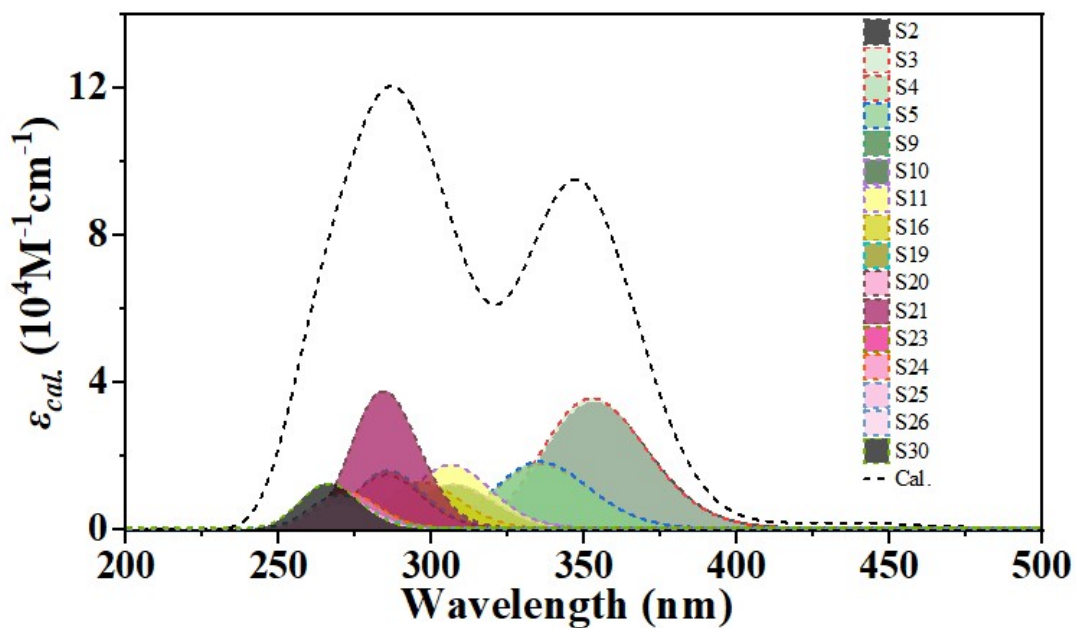

**Fig. S13** Calculated (dashed lines) UV-Vis absorptions of [6]CPP-6'BuPh with separated contributions ( $f > 0.1$ ) from different excited states. The experimental spectra were measured in dichloromethane with a concentration of  $2.0 \times 10^{-6}$  M at room temperature. The calculated absorption profiles were obtained by an effective Gaussian full width half maximum (FWHM) of 0.4 eV.

**Table S4.** Electronic transitions for [6]CPP-6'BuPh determined by TD-DFT methods at PBE0/6-311G(d,p)/PCM(DCM) level. Only those with oscillator strengths greater than 0.02 are listed.

| Excited State | Energy (eV) | Excitation (nm) | Oscillator Strength ( $f_{os}$ ) | Transition Type                                                                                          |
|---------------|-------------|-----------------|----------------------------------|----------------------------------------------------------------------------------------------------------|
| S0→S1         | 2.8494      | 435.12          | 0.0274                           | HOMO → LUMO 97.1%                                                                                        |
| S0→S2         | 3.5092      | 353.31          | 0.5136                           | HOMO → LUMO+1 92.3%                                                                                      |
| S0→S3         | 3.5162      | 352.61          | 0.5293                           | HOMO → LUMO+2 92.0%                                                                                      |
| S0→S4         | 3.6922      | 335.8           | 0.2654                           | HOMO-1 → LUMO 93.4%                                                                                      |
| S0→S5         | 3.6944      | 335.6           | 0.2718                           | HOMO-2 → LUMO 93.7%                                                                                      |
| S0→S9         | 4.0366      | 307.15          | 0.1847                           | HOMO → LUMO+6 67.3%, HOMO-5 → LUMO 7.1%, HOMO-6 → LUMO 6.7%                                              |
| S0→S10        | 4.0389      | 306.98          | 0.1804                           | HOMO → LUMO+7 66.3%, HOMO-4 → LUMO 8.2%, HOMO-7 → LUMO 6.2%                                              |
| S0→S11        | 4.0501      | 306.13          | 0.2617                           | HOMO → LUMO+8 70.6%, HOMO-8 → LUMO 6.9%, HOMO-1 → LUMO+2 5.7%                                            |
| S0→S13        | 4.1549      | 298.4           | 0.0806                           | HOMO-5 → LUMO 45.9%, HOMO → LUMO+4 43.9%                                                                 |
| S0→S14        | 4.1633      | 297.8           | 0.0521                           | HOMO-4 → LUMO 26.9%, HOMO → LUMO+5 26.8%, HOMO-2 → LUMO+2 17.4%, HOMO-1 → LUMO+1 13.2%                   |
| S0→S15        | 4.1708      | 297.27          | 0.0296                           | HOMO-1 → LUMO+1 36.1%, HOMO-2 → LUMO+2 21.8%, HOMO → LUMO+5 14.4%, HOMO-4 → LUMO 14.1%                   |
| S0→S16        | 4.1789      | 296.69          | 0.1913                           | HOMO-2 → LUMO+1 46.3%, HOMO-1 → LUMO+2 42.0%                                                             |
| S0→S17        | 4.2577      | 291.2           | 0.093                            | HOMO-1 → LUMO+2 38.8%, HOMO-2 → LUMO+1 35.0%, HOMO-6 → LUMO 14.5%                                        |
| S0→S18        | 4.2588      | 291.12          | 0.0805                           | HOMO-2 → LUMO+2 42.3%, HOMO-1 → LUMO+1 32.4%, HOMO-7 → LUMO 13.3%, HOMO → LUMO+5 5.2%                    |
| S0→S19        | 4.3404      | 285.65          | 0.2374                           | HOMO-6 → LUMO 56.2%, HOMO → LUMO+6 18.7%                                                                 |
| S0→S20        | 4.3487      | 285.11          | 0.2251                           | HOMO-7 → LUMO 56.3%, HOMO → LUMO+7 19.1%                                                                 |
| S0→S21        | 4.3623      | 284.22          | 0.5622                           | HOMO-8 → LUMO 75.9%, HOMO → LUMO+8 12.7%                                                                 |
| S0→S23        | 4.5529      | 272.32          | 0.1297                           | HOMO → LUMO+11 46.9%, HOMO-3 → LUMO+2 14.8%, HOMO-5 → LUMO 6.2%, HOMO → LUMO+16 5.4%                     |
| S0→S24        | 4.5596      | 271.92          | 0.1507                           | HOMO → LUMO+10 35.5%, HOMO-3 → LUMO+1 21.0%, HOMO → LUMO+9 9.1%, HOMO → LUMO+15 5.7%, HOMO-4 → LUMO 5.3% |

|        |        |        |        |                                                                                               |
|--------|--------|--------|--------|-----------------------------------------------------------------------------------------------|
| S0→S25 | 4.5928 | 269.95 | 0.1075 | HOMO-3 → LUMO+1 46.6%, HOMO →<br>LUMO+10 24.7%, HOMO-4 → LUMO+1 6.3%                          |
| S0→S26 | 4.5995 | 269.56 | 0.1402 | HOMO-3 → LUMO+2 49.6%, HOMO →<br>LUMO+11 18.0%, HOMO-5 → LUMO+1<br>8.9%, HOMO-4 → LUMO+2 7.5% |
| S0→S30 | 4.6582 | 266.16 | 0.1872 | HOMO-5 → LUMO+1 34.0%, HOMO-4 →<br>LUMO+2 29.8%, HOMO → LUMO+12 8.0%                          |

---

**Table S5.** Cartesian coordinates of the optimized [6]CPP-6'BuPh.

|   |          |          |          |   |          |          |          |
|---|----------|----------|----------|---|----------|----------|----------|
| C | 2.760439 | 6.255589 | -4.35104 | H | 2.200924 | 2.715438 | -2.08787 |
| C | 2.726955 | 3.224974 | -0.06474 | H | 2.888768 | 6.151969 | -0.94766 |
| C | 2.810767 | 2.453105 | -1.23087 | H | 4.066745 | 7.105656 | -2.85887 |
| C | 2.532755 | 5.939695 | -1.95135 | H | 3.879509 | 3.63513  | 5.580536 |
| C | 3.195982 | 6.486698 | -3.04482 | H | 3.627073 | 2.173277 | 3.646747 |
| C | 3.884978 | 4.078719 | 4.588492 | H | 4.818886 | 1.3396   | 1.842439 |
| C | 3.751462 | 3.241705 | 3.490437 | H | 3.354373 | 0.590377 | -2.11148 |
| C | 3.738877 | 3.75704  | 2.189271 | H | 3.355209 | 0.585167 | 2.111537 |
| C | 4.240985 | 1.641258 | 0.97214  | H | 4.821091 | 1.332069 | -1.84232 |
| C | 3.591913 | 2.880591 | 0.99975  | H | 3.630693 | 2.167635 | -3.64669 |
| C | 4.076755 | 0.742312 | -0.08703 | H | 3.885556 | 3.629094 | -5.58046 |
| C | 3.474282 | 1.237765 | -1.2479  | H | 4.077924 | 7.099117 | 2.859013 |
| C | 3.476176 | 1.232361 | 1.247959 | H | 2.898452 | 6.147394 | 0.947742 |
| C | 4.077918 | 0.735955 | 0.087115 | H | 2.205114 | 2.712058 | 2.087862 |
| C | 3.596499 | 2.87499  | -0.9997  | H | 1.249081 | 3.231311 | -2.13815 |
| C | 4.243619 | 1.634638 | -0.97205 | H | 3.890326 | 5.557675 | -1.04232 |
| C | 3.744928 | 3.751213 | -2.1892  | H | 4.11529  | 7.03288  | -2.97146 |
| C | 3.756768 | 3.235865 | -3.49037 | H | 1.25769  | 5.234229 | 5.507209 |
| C | 4.021424 | 5.460006 | -4.44573 | H | 0.105259 | 4.263279 | 3.591737 |
| C | 3.891672 | 4.072671 | -4.58841 | H | 1.223993 | 4.859062 | 1.789633 |
| C | 3.206179 | 6.481531 | 3.044923 | H | 1.168102 | 3.168006 | -2.14437 |
| C | 2.542096 | 5.935635 | 1.951418 | H | 2.157574 | 2.634893 | 2.093674 |
| C | 2.814582 | 2.448748 | 1.230893 | H | 3.564311 | 3.478151 | -1.86229 |
| C | 1.441431 | 3.966007 | -0.12509 | H | 3.704917 | 2.00531  | -3.64536 |
| C | 2.732029 | 3.220731 | 0.064748 | H | 5.104482 | 1.472745 | -5.56363 |
| C | 0.722951 | 3.638877 | -1.28245 | H | 8.150583 | 0.01866  | 2.921356 |
| C | 3.877481 | 5.131935 | -2.04121 | H | 6.751478 | 0.552145 | 1.00227  |
| C | 4.012785 | 5.967399 | -3.14503 | H | 3.423899 | 0.574774 | 2.105594 |
| C | 1.632925 | 5.44919  | 4.510238 | H | 3.424752 | 0.569353 | -2.10569 |
| C | 2.770257 | 6.251048 | 4.351127 | H | 6.750594 | 0.562815 | -1.00242 |
| C | 0.967557 | 4.902999 | 3.422545 | H | 8.150562 | 0.00578  | -2.92153 |
| C | 1.411872 | 5.134748 | 2.115762 | H | 5.106876 | 1.464637 | 5.563509 |
| C | 0.6798   | 4.498719 | 0.919932 | H | 3.708116 | 1.999413 | 3.645266 |
| C | 0.718211 | 4.55592  | 0.937377 | H | 3.569798 | 3.472484 | 1.86221  |
| C | 1.383617 | 3.894298 | -0.12707 | H | 2.161674 | 2.631458 | -2.09374 |
| C | 0.661416 | 3.605953 | -1.28955 | H | 1.173103 | 3.16612  | 2.144329 |
| C | 2.784055 | 2.404386 | 1.237146 | H | 1.23162  | 4.857143 | -1.78966 |
| C | 2.662958 | 3.158203 | 0.0654   | H | 0.09859  | 4.263558 | -3.59177 |
| C | 4.280754 | 1.656699 | -0.99131 | H | 1.249495 | 5.236434 | -5.50719 |
| C | 3.531078 | 2.838142 | -0.98388 | H | 4.103965 | 7.039289 | 2.971564 |
| C | 5.120157 | 1.330472 | -2.17196 | H | 3.881452 | 5.56374  | 1.042411 |
| C | 4.691326 | 1.581177 | -3.47618 | H | 1.243981 | 3.233236 | 2.138129 |

|   |          |          |          |   |          |          |          |
|---|----------|----------|----------|---|----------|----------|----------|
| C | 6.749789 | 0.685096 | -4.41177 | H | 5.156573 | 8.074485 | -6.1181  |
| C | 5.490289 | 1.264962 | -4.57161 | H | 4.40488  | 8.544954 | -4.58878 |
| C | 7.176082 | 0.427795 | 3.09956  | H | 5.440574 | 7.102599 | -4.66897 |
| C | 6.384474 | 0.742311 | 2.006367 | H | 4.647543 | 5.0288   | -5.93946 |
| C | 3.506319 | 1.222884 | 1.240537 | H | 3.115452 | 5.055671 | -6.82627 |
| C | 4.1421   | 0.743104 | -0.08483 | H | 4.461387 | 6.069988 | -7.3662  |
| C | 4.140929 | 0.74966  | 0.084728 | H | 2.123595 | 8.545784 | -5.74957 |
| C | 3.508211 | 1.217328 | -1.24063 | H | 2.974611 | 8.139804 | -7.25449 |
| C | 6.383272 | 0.752405 | -2.00651 | H | 1.61053  | 7.151582 | -6.71207 |
| C | 7.175354 | 0.439137 | -3.09972 | H | 4.388593 | 8.423798 | -6.24968 |
| C | 5.49234  | 1.256258 | 4.571485 | H | 5.182341 | 8.025212 | -4.72122 |
| C | 6.750926 | 0.674416 | 4.411625 | H | 3.414956 | 8.201516 | -4.79101 |
| C | 4.693856 | 1.573733 | 3.476073 | H | 5.35558  | 4.884068 | -6.80957 |
| C | 5.122273 | 1.322363 | 2.171841 | H | 6.313982 | 6.035676 | -5.86687 |
| C | 3.535549 | 2.832538 | 0.983791 | H | 5.52682  | 6.553026 | -7.37239 |
| C | 4.283367 | 1.649916 | 0.991207 | H | 2.00532  | 6.464479 | -6.03178 |
| C | 2.667917 | 3.153969 | -0.06547 | H | 2.787395 | 5.14032  | -6.90893 |
| C | 2.787806 | 2.399964 | -1.23722 | H | 2.990461 | 6.806592 | -7.46941 |
| C | 0.667098 | 3.604867 | 1.289508 | H | 1.621758 | 7.148765 | 6.712191 |
| C | 1.389737 | 3.892075 | 0.127025 | H | 2.137057 | 8.542193 | 5.749764 |
| C | 0.711055 | 4.557032 | -0.93739 | H | 2.98741  | 8.134783 | 7.254671 |
| C | 0.686865 | 4.497625 | -0.91996 | H | 4.655386 | 5.021174 | 5.93951  |
| C | 1.403806 | 5.137022 | -2.11574 | H | 3.123338 | 5.050453 | 6.826317 |
| C | 0.959869 | 4.904639 | -3.42254 | H | 4.470888 | 6.062595 | 7.366291 |
| C | 1.62438  | 5.451939 | -4.5102  | H | 4.418341 | 8.537774 | 4.588987 |
| C | 4.00315  | 5.973645 | 3.145125 | H | 5.451731 | 7.093764 | 4.669115 |
| C | 3.869234 | 5.137973 | 2.041292 | H | 5.169275 | 8.066034 | 6.11829  |
| C | 0.717215 | 3.639974 | 1.282422 | H | 8.443264 | 1.4995   | -4.636   |
| C | 1.435186 | 3.968227 | 0.125067 | H | 7.00908  | 1.770101 | -5.63681 |
| C | 4.012534 | 5.46626  | 4.445821 | H | 8.586683 | 1.481282 | -6.39986 |
| C | 3.467541 | 6.831984 | -5.58324 | H | 7.70311  | 0.375634 | -7.75373 |
| C | 4.686274 | 7.686167 | -5.20822 | H | 6.081627 | 0.112369 | -7.10088 |
| C | 3.948866 | 5.675842 | -6.48073 | H | 6.817807 | 1.729248 | -7.04019 |
| C | 2.48289  | 7.71775  | -6.3701  | H | 9.515483 | 0.849382 | -4.54941 |
| C | 4.159252 | 6.346369 | -5.6891  | H | 9.644582 | 0.837662 | -6.31423 |
| C | 4.293407 | 7.833046 | -5.33218 | H | 8.806875 | 2.170044 | -5.49136 |
| C | 5.412864 | 5.926447 | -6.47993 | H | 9.516873 | 0.834419 | 4.549239 |
| C | 2.911012 | 6.175938 | -6.57607 | H | 9.645967 | 0.822456 | 6.314066 |
| C | 3.478266 | 6.826256 | 5.583358 | H | 8.810315 | 2.156152 | 5.491229 |
| C | 2.495024 | 7.713556 | 6.370253 | H | 7.006429 | 1.78121  | 5.6366   |
| C | 3.957742 | 5.669307 | 6.480806 | H | 8.584488 | 1.494852 | 6.399633 |
| C | 4.698362 | 7.67851  | 5.208389 | H | 8.441013 | 1.512801 | 4.635775 |
| C | 7.656917 | 0.315488 | -5.5911  | H | 7.703806 | 0.363402 | 7.753569 |
| C | 7.940367 | 1.198549 | -5.56056 | H | 6.081912 | 0.102643 | 7.100731 |

|   |          |          |          |   |          |          |          |
|---|----------|----------|----------|---|----------|----------|----------|
| C | 7.019748 | 0.656571 | -6.94508 | H | 6.820574 | 1.718391 | 7.040069 |
| C | 8.984189 | 1.089239 | -5.47599 | H | 5.347445 | 4.892429 | 6.809757 |
| C | 7.65749  | 0.303375 | 5.590938 | H | 6.304086 | 6.045556 | 5.867128 |
| C | 8.985958 | 1.075074 | 5.475834 | H | 5.515999 | 6.561655 | 7.372591 |
| C | 7.938597 | 1.211097 | 5.56035  | H | 2.979235 | 6.811197 | 7.469432 |
| C | 7.020864 | 0.645407 | 6.944932 | H | 1.994739 | 6.467529 | 6.031736 |
| C | 4.148879 | 6.352835 | 5.689209 | H | 2.778853 | 5.144607 | 6.908931 |
| C | 5.403099 | 5.934898 | 6.480124 | H | 3.401704 | 8.20681  | 4.791087 |
| C | 2.900849 | 6.180423 | 6.576091 | H | 4.37491  | 8.430623 | 6.249802 |
| C | 4.280707 | 7.839724 | 5.332294 | H | 5.169368 | 8.033294 | 4.721383 |

**Table S6.** Absorption dissymmetry factors for chiral CPP derivatives.

| Compound                                | $\lambda_{\text{abs}}$ [nm] | $g_{\text{abs}}/10^{-3}$ |
|-----------------------------------------|-----------------------------|--------------------------|
| <b>[6]CPP-6'BuPh (this work)</b>        | 355                         | <b>1.05</b>              |
| ([7]CPPRu <sub>2</sub> , <sup>923</sup> | 426                         | <b>7.7</b>               |
| 4CzZ[6]CPP <sup>24</sup>                | 367                         | <b>5.4</b>               |
| [6]CPP-12'BuPh <sup>25</sup>            | 313                         | <b>4.4</b>               |
| diketo[6]CPP <sup>26</sup>              | 340                         | <b>1.0</b>               |
| [12]PCPP <sup>27</sup>                  | 334                         | <b>2.92</b>              |
| SCPP[8] <sup>28</sup>                   | 368                         | <b>12</b>                |

## 7. References

1. M. S. Carle, G. K. Shimokura and G. K. Murphy, *Eur. J. Org. Chem.*, 2016, **2016**, 3930-3933.
2. Y. Tsuchido, R. Abe, T. Ide and K. Osakada, *Angew. Chem. Int. Ed.*, 2020, **59**, 22928-22932.
3. Y. Bai, D. J. Woods, L. Wilbraham, C. M. Aitchison, M. A. Zwijnenburg, R. S. Sprick and A. I. Cooper, *J. Mater. Chem. A*, 2020, **8**, 8700-8705.
4. J.-D. Chai and M. Head-Gordon, *Phys. Chem. Chem. Phys.*, 2008, **10**, 6615-6620.
5. G. A. Petersson, A. Bennett, T. G. Tensfeldt, M. A. Al-Laham, W. A. Shirley and J. Mantzaris, *J. Chem. Phys.*, 1988, **89**, 2193-2218.
6. G. A. Petersson and M. A. Al-Laham, *J. Chem. Phys.*, 1991, **94**, 6081-6090.

7. F. Weigend and R. Ahlrichs, *Phys. Chem. Chem. Phys.*, 2005, **7**, 3297-3305.
8. C. Lee, W. Yang and R. G. Parr, *Phys. Rev. B*, 1988, **37**, 785-789.
9. T. M. McCormick, C. R. Bridges, E. I. Carrera, P. M. DiCarmine, G. L. Gibson, J. Hollinger, L. M. Kozycz and D. S. Seferos, *Macromolecules*, 2013, **46**, 3879-3886.
10. M. E. Casida, C. Jamorski, K. C. Casida and D. R. Salahub, *J. Chem. Phys.*, 1998, **108**, 4439-4449.
11. R. E. Stratmann, G. E. Scuseria and M. J. Frisch, *J. Chem. Phys.*, 1998, **109**, 8218-8224.
12. J. P. Perdew, K. Burke and M. Ernzerhof, *Phys. Rev. Lett.*, 1996, **77**, 3865-3868.
13. W. J. Hehre, L. Radom, P. v. R. Schleyer and J. A. Pople, *Ab initio molecular orbital theory*, Wiley, New York, 1986.
14. B. Y. Simkin and I. Sheikhet, *Quantum Chemical and Statistical Theory of Solutions-A Computational Approach*, Ellis Horwood, London, 1995.
15. J. Tomasi and M. Persico, *Chem. Rev.*, 1994, **94**, 2027-2094.
16. M. Cossi, V. Barone, R. Cammi and J. Tomasi, *Chem. Phys. Lett.*, 1996, **255**, 327-335.
17. E. Cancès, B. Mennucci and J. Tomasi, *J. Chem. Phys.*, 1997, **107**, 3032-3041.
18. C. E. Colwell, T. W. Price, T. Stauch and R. Jasti, *Chem. Sci.*, 2020, **11**, 3923-3930.
19. T. Lu and F. Chen, *J. Comput. Chem.*, 2012, **33**, 580-592.
20. T. Lu, *J. Chem. Phys.*, 2024, **161**(8).
21. W. Humphrey, A. Dalke and K. Schulten, *J. Mol. Graph. Model.*, 1996, **14**, 33-38, 27-28.
22. M. J. Frisch, G. W. Trucks, H. B. Schlegel, G. E. Scuseria, M. A. Robb, J. R. Cheeseman, G. Scalmani, V. Barone, G. A. Petersson, H. Nakatsuji, X. Li, M. Caricato, A. V. Marenich, J. Bloino, B. G. Janesko, R. Gomperts, B. Mennucci, H. P. Hratchian, J. V. Ortiz, A. F. Izmaylov, J. L. Sonnenberg, Williams, F. Ding, F. Lipparini, F. Egidi, J. Goings, B. Peng, A. Petrone, T. Henderson, D. Ranasinghe, V. G. Zakrzewski, J. Gao, N. Rega, G. Zheng, W. Liang, M. Hada, M. Ehara, K. Toyota, R. Fukuda, J. Hasegawa, M. Ishida, T. Nakajima, Y. Honda, O. Kitao, H. Nakai, T. Vreven, K. Throssell, J. A. Montgomery Jr., J. E. Peralta, F. Ogliaro, M. J. Bearpark, J. J. Heyd, E. N. Brothers, K. N. Kudin, V. N. Staroverov, T. A. Keith, R. Kobayashi, J. Normand, K. Raghavachari, A. P. Rendell, J. C. Burant, S. S. Iyengar, J. Tomasi, M. Cossi, J. M. Millam, M. Klene, C. Adamo, R. Cammi, J. W. Ochterski, R. L. Martin, K. Morokuma, O. Farkas, J. B. Foresman and D. J. Fox, 2016, Gaussian 16 Rev. B.01, Wallingford, CT.

23. X. Kong, X. Zhang, B. Yuan, W. Zhang, D. Lu and P. Du, *J. Org. Chem.*, 2024, **89**, 8255-8261.
24. M. X. Yu, C. Feng, W. C. Guo and C. F. Chen, *Chem. Sci.*, 2026, **17**, 1195-1202.
25. W. Zhang, J. Wang, X. Zhang, B. Yuan, P. Fang, N. Yin and P. Du, *Angew. Chem. Int. Ed.*, 2025, **64**, e202508017.
26. D. Wassy, M. Hermann, J. S. Wössner, L. Frédéric, G. Pieters and B. Esser, *Chem. Sci.*, 2021, **12**, 10150-10158.
27. Y. Fan, J. He, L. Liu, G. Liu, S. Guo, Z. Lian, X. Li, W. Guo, X. Chen, Y. Wang and H. Jiang, *Angew. Chem. Int. Ed.*, 2023, **62**, e202304623.
28. X. Zhang, H. Liu, G. Zhuang, S. Yang and P. Du, *Nat. Commun.*, 2022, **13**, 3543.
